1 **Analysis of genome-wide differentiation between native and introduced populations of the**  
2 **cupped oysters *Crassostrea gigas* and *Crassostrea angulata***

3

4 Pierre-Alexandre Gagnaire<sup>1</sup>, Jean-Baptiste Lamy<sup>2</sup>, Florence Cornette<sup>2</sup>, Serge Heurtebise<sup>2</sup>, Lionel  
5 Dégremont<sup>2</sup>, Emilie Flahauw<sup>2</sup>, Pierre Boudry<sup>3</sup>, Nicolas Bierne<sup>1</sup>, and Sylvie Lapègue<sup>2,\*</sup>

6 <sup>1</sup>ISEM - CNRS, UMR5554, Institut des Sciences de l'Evolution, 34095 Montpellier, France

7 <sup>2</sup>Ifremer, SG2M-LGPMM, Laboratoire de Génétique et Pathologie des Mollusques Marins, 17390 La  
8 Tremblade, France

9 <sup>3</sup>Ifremer, UMR LEMAR, Laboratoire des Sciences de l'Environnement Marin, 29200 Plouzané,  
10 France

11 \* Corresponding author (Sylvie.Lapegue@ifremer.fr)

12

13 **Data deposition**

14 Raw sequences data as well as genetic maps, genome-assembly, and SNP datasets have been deposited  
15 on <http://dx.doi.org/10.12770/dbf64e8d-45dd-437f-b734-00b77606430a>.

16

17

18 **Abstract**

19 The Pacific cupped oyster is genetically subdivided into two sister taxa, *Crassostrea gigas* and *C.*  
20 *angulata*, which are in contact in the north-western Pacific. The nature and origin of their genetic and  
21 taxonomic differentiation remains controversial due the lack of known reproductive barriers and  
22 morphologic similarity. In particular, whether ecological and/or intrinsic isolating mechanisms  
23 participate to species divergence remains unknown. The recent co-introduction of both taxa into  
24 Europe offers a unique opportunity to test how genetic differentiation maintains under new  
25 environmental and demographic conditions. We generated a pseudo-chromosome assembly of the  
26 Pacific oyster genome using a combination of BAC-end sequencing and scaffold anchoring to a new  
27 high-density linkage map. We characterized genome-wide differentiation between *C. angulata* and *C.*  
28 *gigas* in both their native and introduced ranges, and showed that gene flow between species has been  
29 facilitated by their recent co-introductions in Europe. Nevertheless, patterns of genomic divergence  
30 between species remain highly similar in Asia and Europe, suggesting that the environmental  
31 transition caused by the co-introduction of the two species did not affect the genomic architecture of  
32 their partial reproductive isolation. Increased genetic differentiation was preferentially found in  
33 regions of low recombination. Using historical demographic inference, we show that the heterogeneity  
34 of differentiation across the genome is well explained by a scenario whereby recent gene flow has  
35 eroded past differentiation at different rates across the genome after a period of geographical isolation.  
36 Our results thus support the view that low-recombining regions help in maintaining intrinsic genetic  
37 differences between the two species.

38

39 **Key Words:** Cupped oysters, Genome assembly, Species divergence, Reproductive barriers,  
40 Recombination rate

41

## 42 **Introduction**

43 Broadcast-spawning marine invertebrates usually display high genetic similarity between adjacent  
44 populations, a consequence of combining high dispersal ability and large population sizes. Many such  
45 species, however, appear to be genetically subdivided into sibling species, cryptic species-pairs,  
46 ecotypes, or partially reproductively isolated populations (Knowlton, 1993, Bierne et al., 2011,  
47 Palumbi, 1994, Kelley et al., 2016, Hellberg, 2009, Gagnaire et al., 2015). The ability to score  
48 divergence at the genomic level in non-model organisms has recently revealed an increasing number  
49 of cases of cryptic species subdivision in broadcast-spawning marine invertebrates (e.g. Ravinet et al.,  
50 2015, Westram et al., 2014, Fraïsse et al., 2016, Rose et al., 2018). These recent findings confirm the  
51 view that semi-permeable barriers to gene flow between closely related taxa (Harrison & Larson,  
52 2014, Harrison & Larson, 2016) are relatively frequent in the marine realm, and may explain short-  
53 distance genetic differentiation patterns that are seemingly in contradiction with species' dispersal  
54 potential.

55 The existence of marine semi-isolated species pairs evolving in the “grey zone” of the speciation  
56 continuum (Roux et al., 2016), that is, before complete reproductive isolation, provides interesting  
57 opportunities to contribute to some highly debated questions in the field of speciation genomics.  
58 Speciation is a progressive process by which reproductive isolation barriers of various types  
59 progressively appear and combine their effects to reduce gene flow (Abbott et al., 2013). As long as  
60 speciation is not complete, diverging populations continue to evolve non-independently because some  
61 regions of their genome can still be exchanged. This results in a dynamic architecture of divergence  
62 characterized by temporal changes in the number, genomic distribution and magnitude of the genetic  
63 differences between incipient species. The speciation genomics approach investigates this architecture  
64 by characterizing heterogeneous genome divergence patterns, ultimately aiming at a detection of the  
65 loci directly involved in reproductive isolation (Feder et al., 2012). This strategy, however, has come  
66 up against a large diversity of evolutionary processes influencing the genomic landscape of species  
67 divergence (Ravinet et al., 2017, Wolf & Ellegren, 2017, Yeaman et al., 2016), some of which are not  
68 directly linked to speciation (Noor & Bennett, 2009, Nachman & Payseur, 2012, Cruickshank & Hahn,  
69 2014, Burri, 2017). The field is now progressively moving toward a more mechanistic understanding

70 of the evolutionary processes underlying heterogeneous genome divergence. However, the issue of  
71 distinguishing the impact of genetic barriers from the effect of confounding processes such as linked  
72 selection remains challenging (Burri, 2017). Because genetic divergence does not easily maintain in  
73 the face of gene flow in the absence of genetic barriers (Bierne et al., 2013), high gene flow species  
74 such as broadcast-spawning marine invertebrates offer valuable study systems for disentangling the  
75 mechanisms at play during speciation.

76 Here, we investigated the existence and the type of genetic barriers between divergent lineages of  
77 the Pacific cupped oyster, which has been taxonomically subdivided into two sister species,  
78 *Crassostrea gigas* and *C. angulata*. The two species are presumed to be parapatrically distributed in  
79 their native range in the north-western Pacific, but the location of putative contact zones remains  
80 largely unknown. Whether *C. gigas* and *C. angulata* truly represent biological species, semi-isolated  
81 species or populations of the same species also remains unclear. The two taxa can be cross-fertilized in  
82 the laboratory to form viable and fertile offspring (Huvet et al., 2001, Huvet et al., 2002, Takeo &  
83 Sakai, 1961), and some authors have proposed that they should be considered as a single species  
84 (Reece et al., 2008, López-Flores et al., 2004). On the other hand, the finding of genetic differences  
85 between *C. angulata* and *C. gigas* lead other authors to conclude that they form different but  
86 genetically closely related species (Boudry et al., 1998, Lapegue et al., 2004, Ren et al., 2010, Wang et  
87 al., 2014). One originality of the Pacific cupped oyster system is the co-introduction of both taxa into  
88 Europe. *C. angulata*, also called the Portuguese oyster, is presumed to have been non-voluntarily  
89 introduced by merchant ships during the 16<sup>th</sup> century, probably from Taiwan (Boudry et al., 1998,  
90 Huvet et al., 2000) although the exact origins of introduced stocks remains unknown (Grade et al.,  
91 2016). Recent studies have shown that this species is widely distributed in Asian seas where it shows a  
92 high genetic diversity (Zhong et al., 2014b, Sekino & Yamashita, 2013, Wang et al., 2010, Hsiao et  
93 al., 2016), and also suggested a more complex history of transfers between Asia and Europe (Grade et  
94 al., 2016). The Pacific oyster, *C. gigas*, has been voluntarily introduced from Japan and British  
95 Columbia into Europe in the early 1970s, mainly to replace the Portuguese oyster in the French  
96 shellfish industry following a severe disease outbreak (Grizel & Héral, 1991). Since then, the two  
97 species are in contact in southern Europe and therefore have the potential to exchange genes in a new

98 environment (Batista, et al. 2017; Huvet, et al. 2004). Gene flow in the context of marine invasions has  
99 mainly been studied between native and non-indigenous lineages (Saarman and Pogson 2015; Viard,  
100 et al. 2016) but rarely between two co-introduced genetic backgrounds in a new place. A notorious  
101 exception is the European green crab (*Carcinus maenas*) in the Northwest Atlantic (Darling, et al.  
102 2008). However, although the genome-wide genetic differentiation has been studied in the introduced  
103 range (Jeffery, et al. 2017; Jeffery, et al. 2018), it has not been compared with the differentiation  
104 observed in the native range to date.

105 In the present study, we first generated new genomic resources in the Pacific oyster to improve the  
106 species genome assembly and characterize chromosomal variation in recombination rate. Then, we  
107 tested the existence of genetic barriers between *C. angulata* and *C. gigas* by searching for genomic  
108 regions that remain differentiated in the presence of gene flow, accounting for the demographic  
109 divergence history of the species. We also evaluated whether ecological divergence driven by local  
110 adaptations is the main factor maintaining species divergence in the native range. We hypothesized  
111 that if this is the case, the different ecological conditions encountered by the two species in Europe  
112 would have reshaped the original genomic landscape of species divergence existing in the native Asian  
113 range. Finally, we attempted to relate genome-wide divergence patterns to underlying evolutionary  
114 processes including demography, selection and genomic constraints.

115

## 116 **Material and Methods**

### 117 ***Biological material for the mapping populations***

118 Two F2 families (second generation of biparental crosses) were used for genetic map reconstruction in  
119 *C. gigas*. These families were obtained by experimental breeding as part of the MOREST project  
120 (Boudry, et al. 2008; Dégremont, et al. 2010) by crossing families selected for resistance (*R*) or  
121 susceptibility (*S*) to summer mortality, which were subsequently found to have respectively higher and  
122 lower resistance to the herpesvirus OsHV-1 (Dégremont 2011). The F2-19 family was generated  
123 through biparental crossing between an *S* female and an *R* male to produce a F1 family from which a  
124 single sib-pair was randomly sampled to produce the F2 progeny. The F2-21 family was obtained  
125 under the same mating scheme but starting with an *R* female and a *S* male. A total of 293 and 282 F2

126 progenies were used for map reconstruction in family F2-19 and F2-21, respectively. For each  
127 individual, whole genomic DNA was isolated from muscle tissue using the QIAamp DNA minikit  
128 (Qiagen). DNA was checked for quality by electrophoresis on agarose gel and then quantified using  
129 the Quant-iT PicoGreen dsDNA assay kit (Life Technologies).

130

### 131 ***Genotyping panel for low-density map construction***

132 We genotyped F1 parents and their F2 progenies in both families (F2-19: 2 F1 and 293 F2; F2-21: 2  
133 F1 and 282 F2) using a panel of 384 SNPs previously developed in *C. gigas* (Lapègue et al., 2014).  
134 SNP genotyping was performed using the Golden Gate assay and analyzed with the Genome Studio  
135 software (Illumina Inc). In addition, 42 microsatellite markers were also genotyped according to  
136 published protocols (Li et al., 2003, Taris et al., 2005, Yamtich et al., 2005, Li et al., 2010, Sauvage et  
137 al., 2010) in order to include markers from previous generation linkage maps in *C. gigas* (Hubert &  
138 Hedgecock, 2004, Sauvage et al., 2010).

139

### 140 ***RAD genotyping for high-density map construction***

141 We selected 106 progenies from each family as well as their four F1 parents for RAD library  
142 construction following the original protocol (Baird et al., 2008). Briefly, 1 µg of genomic DNA from  
143 each individual was digested with the restriction enzyme *Sbf*I-HF (New England Biolabs), and then  
144 ligated to a P1 adapter labeled with a unique barcode. We used 16 barcodes of 5-bp and 16 barcodes of  
145 6-bp long in our P1 adapters to build 32-plex libraries. Seven pools of 32 individuals were made by  
146 mixing individual DNA in equimolar proportions. Each pool was then sheared to a 350 pb average  
147 size using a Covaris S220 sonicator (KBiosciences), and size-selected on agarose gel to keep DNA  
148 fragments within the size range 300-700 pb. Each library was then submitted to end-repair, A-tailing  
149 and ligation to P2 adapter before PCR amplification for 18 cycles. Amplification products from six  
150 PCR replicates were pooled for each library, gel-purified after size selection and quantified on a 2100  
151 Bioanalyzer using the High Sensitivity DNA kit (Agilent). Each library was sequenced on a separate  
152 lane of an Illumina HiSeq 2000 instrument by IntegraGen Inc. (France, Evry), using 100-bp single  
153 reads.

154 We used the program *Stacks* (Catchen et al., 2013, Catchen et al., 2011) to build loci from short-  
155 read sequences and determine individual genotypes. Raw sequence reads were quality filtered and  
156 demultiplexed using *process\_radtags.pl* before being trimmed to 95 bp. We explored different  
157 combinations of parameter values for the minimum stack depth (-m) and the maximum mismatch  
158 distance (-M) allowed between two stacks to be merged into a locus. We found that the combination -  
159 m 3 -M 7 represented the best compromise to avoid overmerging loci, while providing an average  
160 number of 2.3 SNPs per polymorphic RAD locus (Supplementary Figure S1) which is consistent with  
161 the high polymorphism rate in *C. gigas* (Sauvage et al., 2007, Zhang et al., 2012). Individual *de novo*  
162 stack formation was done with *ustacks* (-m 3 -M 7 -r -d). We then built a catalog of loci using all  
163 individuals from both families with *cstacks* (-n 7) and matched back all the samples against this  
164 catalog using *sstacks*. After this step, the two families were treated as two separate populations to  
165 produce a table of observed haplotypes at each locus in each family using *populations*.

166 We developed a Bayesian approach that uses information from progenies' genotypes to correct for  
167 missing and miscalled genotypes in parental samples. The probability of a given combination of  
168 parental genotypes ( $G_P$ ) conditional on the genotypes observed in their descendants ( $G_D$ ) is given by

$$170 \quad P(G_P|G_D) = \frac{P(G_D|G_P) \times P(G_P)}{P(G_D)}$$

171  
172 where the probability of the observed counts of progenies' genotypes ( $N_{AA}, N_{AB}, N_{AC}, N_{AD}, N_{BB}, N_{BC},$   
173  $N_{BD}$ ) conditional on the genotypes of their parents is drawn from a multinomial distribution that takes  
174 different parameter values for each of the six alternative models of parental genotypes (i.e. crosses  
175 AA×AA, AA×AB, AB×AB, AA×BB, AB×AC and AB×CD). Each RAD locus was treated  
176 independently using observed haplotypes to determine the best model of parental haplotype  
177 combination. When the actual haplotypes called in parents did not match the best model, a correction  
178 was applied to restore the most likely combination of parental haplotypes, taking read depth  
179 information into account. Data were finally exported in *JoinMap 4* format with population type CP

180 (van Ooijen, 2006). The approach for correcting missing and miscalled haplotypes in parental samples  
181 was coded into R.

182

### 183 *Genetic map construction*

184 A new Pacific oyster linkage map was constructed in four successive steps: (i) First, a low-density  
185 map was built for each family using the SNP and microsatellite markers dataset. These two maps were  
186 used to provide accurate ordering of markers, since both mapping populations comprised  
187 approximately 300 individuals with very few missing genotypes (0.5%). (ii) In a second step, we tried  
188 to reach a consensus order for the markers that were included in the two previous maps, in order to  
189 determine a set of anchor loci for each linkage group. (iii) Third, we included RAD markers and  
190 determined the order of all loci in each mapping family after setting a fixed order for the anchor loci.  
191 (iv) Finally, we integrated the two high-density linkage maps to produce a consensus genetic map for  
192 the Pacific oyster.

193 All linkage mapping analysis were performed using *JoinMap 4* (van Ooijen, 2006). Markers  
194 showing significant segregation ratio distortion after Bonferroni correction ( $p < 0.05$ ) were removed  
195 from the analysis. Markers were grouped using an independence LOD threshold of 16 for the SNP and  
196 microsatellite marker datasets and a LOD threshold of 10 for the RAD marker datasets. Additional  
197 ungrouped markers were assigned at a LOD threshold of 5 using their strongest cross-link information.  
198 We used the regression mapping algorithm to build the maps using a recombination frequency  
199 threshold of 0.4, a minimal LOD score of 1 and a goodness-of-fit jump value of 5. The ordering of  
200 markers was optimized using the ripple function after each added locus. Map distances in  
201 centiMorgans (cM) were calculated from recombination frequencies using Kosambi's mapping  
202 function.

203

### 204 *Identification of chimeric scaffolds and reassembly using BAC-end scaffolding*

205 In order to detect chimeric scaffolds in the oyster\_v9 assembly (Zhang et al., 2012), the consensus  
206 sequences of the markers included in the new linkage map were blasted against the reference genome.  
207 An E-value threshold of  $10^{-30}$  and a minimum identity threshold of 90% were set to retain only highly



208 significant matches. Assembly errors were identified by scaffolds anchored to more than a single  
209 linkage group. Chimeric scaffolds were subsequently splitted at all stretches of Ns connecting adjacent  
210 contigs.

211 In order to improve the scaffolding of the Pacific oyster genome, we sequenced 73,728 BAC clones  
212 of 150 kb average insert size (Gaffney 2008) from both ends using Sanger sequencing at the  
213 Genoscope facility (Evry, France). This resulted in 60,912 cleaned full-length (i.e. >1300 bp) BAC-  
214 End sequences (BES) pairs. Each sequence from each pair was trimmed to only conserve 1000 bp  
215 between positions 10 and 1010, and clipped into 19 evenly-spaced 100-mers overlapping by 50 bp.  
216 This clipping procedure aimed at constructing a high quality short-read paired-end dataset from our  
217 BES dataset.

218 Clipped BES were used for an additional round of contig extension and scaffolding with *SSPACE*  
219 (Boetzer et al., 2011). For each LG, we used unambiguously anchored scaffolds and contigs  
220 originating from splitted scaffolds matching to this LG. Clipped BES were aligned to scaffolds using  
221 *Bowtie2* (Langmead & Salzberg, 2012), allowing at most 3 mismatches per 100-bp read. Scaffolding  
222 parameters to *SSPACE* were set to a minimum of 5 links (-k) to validate a new scaffold pair and a  
223 maximum link ratio of 0.7 (-a). Scaffolding was only permitted between scaffolds of at least 1000 bp,  
224 using an allowed insert size range of 75-225 kb.

225

### 226 *Scaffold anchoring to the linkage map*

227 We searched for non-ambiguous associations between the new set of extended scaffolds and markers  
228 included in the consensus linkage map using the same blasting procedure as prior to genome  
229 reassembly. We constructed pseudo-chromosomes by positioning scaffolds along each linkage group  
230 using *Harry Plotter* (Moretto et al., 2010). Because the genetic resolution of our consensus map was  
231 still limited by the size of our mapping populations (about 100 individuals each), many scaffolds were  
232 anchored by a single marker or had too few markers to determine their orientation. Therefore, we did  
233 not determine scaffold orientation. Scaffolds that were anchored to multiple markers were positioned  
234 using the average cM value of their anchor loci. Unmapped scaffolds were placed in an artificial  
235 chromosome named UN.

236

### 237 ***Local recombination rate estimation***

238 We used the R package *MareyMap v1.2* (Rezvoy et al., 2007) to estimate local recombination rates  
239 along the genome, by comparing the consensus linkage map and the physical map for each pseudo-  
240 chromosome. The relationship between genetic and physical distances was first visualized to remove  
241 outlier markers resulting from scaffold misplacement within pseudo-chromosomes. We then used the  
242 Loess interpolation method which estimates recombination rates by locally adjusting a 2<sup>nd</sup> degree  
243 polynomial curve, setting the span parameter value to 0.25.

244

### 245 ***RAD genotyping of natural populations***

246 We sampled four wild populations of *C. gigas* and *C. angulata* from both their native Asian and  
247 introduced Atlantic areas. We used 24 individuals of *C. gigas* from both Japan (native) and French  
248 Brittany (introduced), and 24 individuals of *C. angulata* from both Taiwan (native) and Portugal  
249 (introduced). We prepared and sequenced four 24-plex RAD libraries using the same protocol as  
250 described above.

251 Cleaned demultiplexed reads were mapped to each newly assembled pseudo-chromosome using  
252 *Bowtie2* (Langmead & Salzberg, 2012) with the very-sensitive option, allowing a maximum of 7  
253 mismatches per alignment. SNPs were called from aligned reads with *Stacks* using a minimum read  
254 depth of 5x per individual per allele (Catchen et al., 2011, Catchen et al., 2013). The correction  
255 module *rxstacks* was used to re-evaluate individual genotypes and exclude low-quality variants with a  
256 cutoff log-likelihood value of -500. Only RAD loci that were successfully genotyped in at least 80%  
257 of the samples in each population were retained for subsequent population genomic analyses.

258

### 259 ***Population genomic analyses***

260 We used *VCFtools* v0.1.11 (Danecek et al., 2011) to apply within-population filters to exclude loci  
261 showing more than 4 missing genotypes over 24 individuals, as well as markers showing departure to  
262 Hardy-Weinberg equilibrium within at least one population using a p-value cutoff of 0.01. Nucleotide  
263 diversity ( $\pi$ ), computed as the average number of pairwise differences, was estimated from retained

264 loci for each population within 150 kb windows. Genetic differentiation between all possible pairs of  
265 populations was estimated SNP by SNP as well as in 150 kb windows using  $F_{ST}$  (Weir & Cockerham,  
266 1984). Within- and between-population components of genetic diversity were decomposed using a  
267 discriminant analysis of principal components (dAPC), in order to maximize genetic variation between  
268 populations while minimizing within-population variance. The dAPC analysis performed with the R  
269 package *Adegenet* (Jombart, 2008), using the global SNP dataset containing the two populations from  
270 both species with only one randomly selected SNP per RAD locus.

271 In order to evaluate the influence of recombination rate variation on genetic differentiation  
272 between species, we used a nonparametric quantile regression approach. Recombination rate and  $F_{ST}$   
273 values (averaged between the Asian and European species pair) were averaged in 500 kb windows to  
274 increase the number of informative sites per window. We excluded windows with recombination rate  
275 values exceeding 9 cM/Mb (i.e. corresponding to the 98<sup>th</sup> percentile of the distribution of estimated  
276 recombination rate). This cutoff aimed at removing outlying recombination rate values estimated  
277 along chromosome IX (Figure 1). The 97.5<sup>th</sup> quantile regression fit of the distribution of  $F_{ST}$  as a  
278 function of recombination rate was computed at each of 10 equally spaced recombination intervals  
279 distributed over the range of recombination values.

280

### 281 ***Inference of the demographic divergence history***

282 We inferred the demographic divergence history between *C. angulata* and *C. gigas* in both their native  
283 and introduced ranges using a version of the program  $\delta a\delta i$  (Gutenkunst et al., 2009) modified by (Tine  
284 et al., 2014). The observed joint allele frequency spectrum (JAFS) of each population pair was  
285 obtained by randomly selecting one SNP for each pair of RAD loci associated to the same restriction  
286 site in order to avoid the effect of linkage between SNPs, and then by projecting the data to 20  
287 chromosomes per population to reduce the JAFS size. We first considered four classical models of  
288 divergence including models of strict isolation (SI), isolation-with-migration (IM), ancient migration  
289 (AM) and secondary contact (SC). We also considered extensions of the three divergence-with-gene-  
290 flow models assuming two categories of loci occurring in proportions  $P$  and  $1-P$  and having different  
291 migration rates: IM2 $m$ , AM2 $m$  and SC2 $m$  (Tine et al., 2014). These models offer simplified but more

292 realistic representations of the speciation process, by enabling loci to be either neutrally exchanged  
293 between populations, or to have a reduced effective migration rate to account for the direct and  
294 indirect effects of selection. Each model was fitted to the observed JAFS (singletons were masked)  
295 using three successive optimization steps: hot simulated annealing, cold simulated annealing and  
296 BFGS. Comparison among models was made using the Akaike Information Criterion (AIC).

297

## 298 **Results**

### 299 *Construction of an integrated high-density linkage map*

300 The microsatellite and SNP datasets used for constructing the low-density linkage map contained 133  
301 informative markers in family F2-19 (293 progeny, Table S1) and 137 informative markers in family  
302 F2-21 (282 progeny, Table S2). Ten linkage groups were found in each family in agreement with the  
303 haploid number of chromosomes of the species, and the two maps generated by the first round of  
304 regression mapping respectively contained 98 and 105 mapped markers in family F19 and F21. The  
305 integrated map obtained after identifying homologous LG pairs between families contained 136  
306 markers successfully ordered after the first round of regression mapping. This sex-averaged consensus  
307 low-density linkage map displayed a strong collinearity with the two maps from which it was derived  
308 (Supplementary Figure S2, left panel), indicating that the ordering of markers was highly consistent  
309 between the two families. We thus used it as an anchoring map to support the construction of the high-  
310 density RAD-linkage map.

311 The average number of filtered RAD-Sequencing reads obtained per individual was similar  
312 between family F2-19 ( $1.8 \times 10^6$ ) and F2-21 ( $1.9 \times 10^6$ ). After correcting for missing and miscalled  
313 haplotypes in parental samples, the number of informative markers was 1278 in family F2-19 and 996  
314 in family F2-21 (Table S3, Table S4). A total of 1855 markers were assigned to linkage groups (1231  
315 in family F19 and 935 in family F21, 311 in common), and the number of markers per linkage groups  
316 was highly positively correlated between families ( $R^2=0.71$ , Supplementary Figure S3). Using the  
317 anchoring map to set fixed orders, the two RAD maps generated after three rounds of regression  
318 mapping respectively contained 1023 and 705 mapped markers in family F19 and F21, respectively.  
319 The final combination of these two maps resulted in a sex-averaged consensus map containing 1516

320 markers (Table 1, Table S5, and Supplementary Figure S2, right panel). The total map length was 965  
 321 cM and the average spacing between two neighboring markers was 0.64 cM. We compared this new  
 322 linkage map to the Pacific oyster's second generation linkage map (Table S7 from Hedgecock et al.,  
 323 2015) using scaffolds from the oyster reference genome (oyster\_v9, Zhang et al., 2012) as  
 324 intermediate. Using 278 pairs of markers colocalized to the same scaffolds, we found a good  
 325 collinearity between the two maps, as illustrated by linkage group-wise correlations between  
 326 recombination distances ( $0.35 < R^2 < 0.90$ , Supplementary Figure S4).

327

328 **Table 1.** Summary statistics for the 10 linkage groups of the new *C. gigas* high-density linkage map  
 329 and the reassembled physical genome.

| LG   | Correspondance with Hedgecock et al. 2015 | Length (cM) | Nb of markers F2-19 | Nb of markers F2-21 | Total nb of markers | marker spacing | physical length of anchored scaffolds | recombination rate (cM/Mb) | recombination rate MareyMap (cM/Mb) |
|------|-------------------------------------------|-------------|---------------------|---------------------|---------------------|----------------|---------------------------------------|----------------------------|-------------------------------------|
| I    | 1                                         | 90.92       | 86                  | 88                  | 158                 | 0.58           | 31113268                              | 2.92                       | 2.61                                |
| II   | 4                                         | 94.23       | 89                  | 56                  | 117                 | 0.81           | 21949604                              | 4.29                       | 3.65                                |
| III  | 5                                         | 99.17       | 166                 | 69                  | 229                 | 0.43           | 27979720                              | 3.54                       | 3.40                                |
| IV   | 7                                         | 116.98      | 149                 | 103                 | 226                 | 0.52           | 41226161                              | 2.84                       | 2.29                                |
| V    | 10                                        | 72.01       | 95                  | 74                  | 163                 | 0.44           | 35636424                              | 2.02                       | 2.18                                |
| VI   | 3                                         | 98.87       | 143                 | 60                  | 132                 | 0.75           | 28856184                              | 3.43                       | 2.71                                |
| VII  | 8 & 2                                     | 88.78       | 113                 | 71                  | 157                 | 0.57           | 33248857                              | 2.67                       | 2.36                                |
| VIII | 9                                         | 108.20      | 64                  | 68                  | 131                 | 0.83           | 22447078                              | 4.82                       | 4.13                                |
| IX   | 6                                         | 136.51      | 94                  | 58                  | 124                 | 1.10           | 21192597                              | 6.44                       | 5.47                                |
| X    | 6                                         | 58.89       | 24                  | 58                  | 79                  | 0.75           | 16594032                              | 3.55                       | 3.65                                |
| ALL  | -                                         | 964.55      | 1023                | 705                 | 1516                | 0.64           | 280243925                             | 3.44                       | 3.05                                |

330

331

### 332 *Pseudo-chromosome assembly*

333 A majority (78.3%) of the markers included in the new consensus RAD linkage map matched to the  
 334 oyster reference genome (oyster\_v9, Zhang et al., 2012). Among the 592 scaffolds that were matched  
 335 with mapped markers, 327 (55.2%) contained a single mapped marker, 127 (21.5%) contained two  
 336 markers, and 138 (23.3%) contained three to eleven markers (Table S6). We found 117 (44.2%)  
 337 chimeric scaffolds mapping to different linkage groups among the 265 scaffolds containing at least

338 two markers. Splitting chimeric scaffolds into smaller contigs at poly-N stretches decreased the  
339 assembly N50 size from 401 kb to 218 kb.

340 Contig extension and scaffolding using clipped BES allowed the merging of 4162 contigs. The  
341 mean insert size of mapped BES was 116 kb, which was consistent with the mean insert size of the  
342 BAC end library. The resulting N50 of new scaffolds increased by 47% to 320 kb (Table S7). A total  
343 of 773 scaffolds from this new set of extended scaffolds were anchored to 1161 loci of the consensus  
344 linkage map. Among them, 531 (68.7%) contained a single mapped marker, 153 (19.8%) contained  
345 two markers, and 89 (11.5%) contained three to seven markers (Table S8). The pseudo-chromosomes  
346 assembly obtained had a length of 280.2 Mb (Figure 1), representing 50.1% of the total length of the  
347 oyster\_v9 assembly (Zhang et al., 2012).

348

349 **Fig. 1.** Anchoring of newly edited scaffolds (blue) into pseudo-chromosomes using the markers  
350 included in the 10 linkage groups (red) of the new consensus linkage map. Comparison of the physical  
351 (x axis, Mb) and the genetic (y axis, cM) maps are provided for each linkage group (green points,  
352 outlier values removed), as well as the local recombination rate (orange line) estimated using the  
353 Loess interpolation method in *MareyMap*.

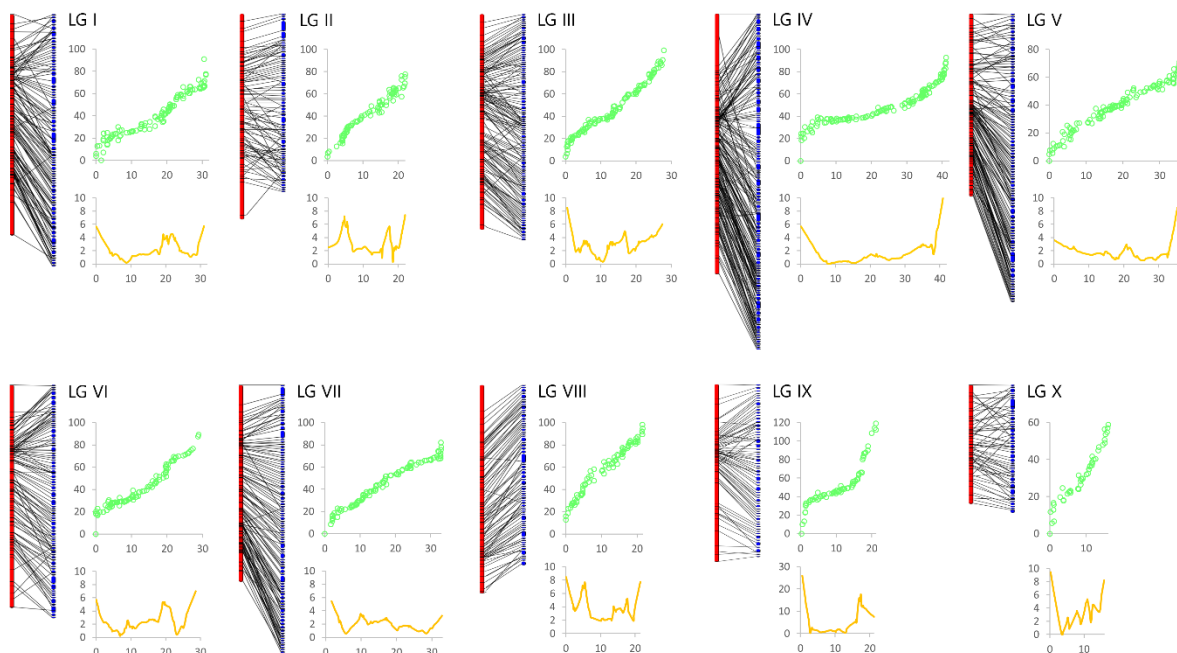

354

355

356 **Local recombination rate**

357 The comparison between the pseudo-chromosome assembly and the consensus linkage map revealed  
358 variation in local recombination rate along chromosomes, with generally increased values toward  
359 linkage group extremities compared to central chromosomal regions (Figure 1). The average genome-  
360 wide recombination rate estimated with *MareyMap* was 3.05 cM/Mb, a value close to the total map  
361 length divided by the size of the assembly (3.44 cM/Mb). The real value, however, may be twice  
362 lower considering that the pseudo-chromosome assembly only represents 50% of the total genome  
363 size. The average chromosome-wide recombination rate (Table 1) was negatively correlated with  
364 chromosome length ( $R^2 = 0.61$ , Figure 2), as expected under strong chiasma interference.

365

366 **Fig. 2.** Negative correlation between the length of newly assembled pseudo-chromosomes and the  
367 average chromosome-wide recombination rate assessed with *MareyMap*. Chromosome lengths and  
368 raw estimates of recombination rate are based on the physical chromosome lengths effectively covered  
369 by scaffolds. Rescaled values taking into account the presence of unmapped scaffolds can be obtained  
370 by multiplying (dividing) chromosome length (recombination rate) values by two (see text).

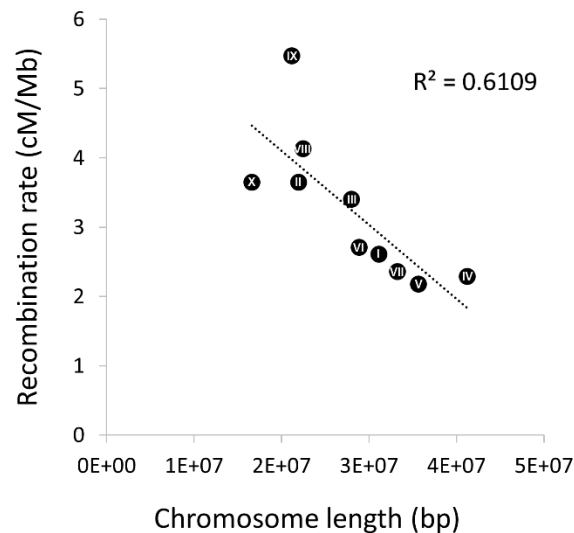

371

372

373 **Genetic diversity and differentiation**

374 The average number of sequence reads retained per individual for calling genotypes was  $3.1 \times 10^6$ .  
375 After filtering for missing genotypes, HWE and a minor allele frequency of 1%, we kept a total of  
376 10,144 SNPs from 1,325 RAD loci for downstream genetic diversity analyses. Within-population  
377 nucleotide diversity was elevated in both species and showed very similar levels between native and  
378 introduced populations (*C. angulata*:  $\pi_{KEE} = 0.0095$ ,  $\pi_{SAD} = 0.0096$ ; *C. gigas*:  $\pi_{JAP} = 0.0099$ ,  $\pi_{LAF} =$   
379  $0.0101$ ). The genome-wide averaged differentiation assessed by  $F_{ST}$  between native and introduced  
380 populations from the same species was higher in *C. angulata* ( $F_{ST\ KEE-SAD} = 0.0179$ ) compared to *C.*  
381 *gigas* ( $F_{ST\ JAP/LAF} = 0.0130$ ). The mean genetic differentiation between species was very similar  
382 between Asia ( $F_{ST\ KEE/JAP} = 0.0440$ ) and Europe ( $F_{ST\ SAD/LAF} = 0.0459$ ).

383

384 **Fig. 3. (A)** dAPC plot of the four populations of Pacific cupped oysters assessed with 1,325 SNPs (one  
385 SNP per RAD), with *C. angulata* from Asia (KEE, light blue) and Europe (SAD, dark blue), and *C.*  
386 *gigas* from Asia (JAP, light red) and Europe (LAF, dark red). **(B)** Genetic parallelism in the level of  
387 differentiation between species in Asia (x axis) and Europe (y axis) measured at 10,144 SNPs. The  
388 black line shows the  $y = x$  equation line and the red dashed line corresponds to the linear regression  
389 ( $F_{ST\ Europe} = 0.83 \times F_{ST\ Asia} + 0.01$ ,  $R^2 = 0.71$ ,  $P < 10^{-10}$ ).

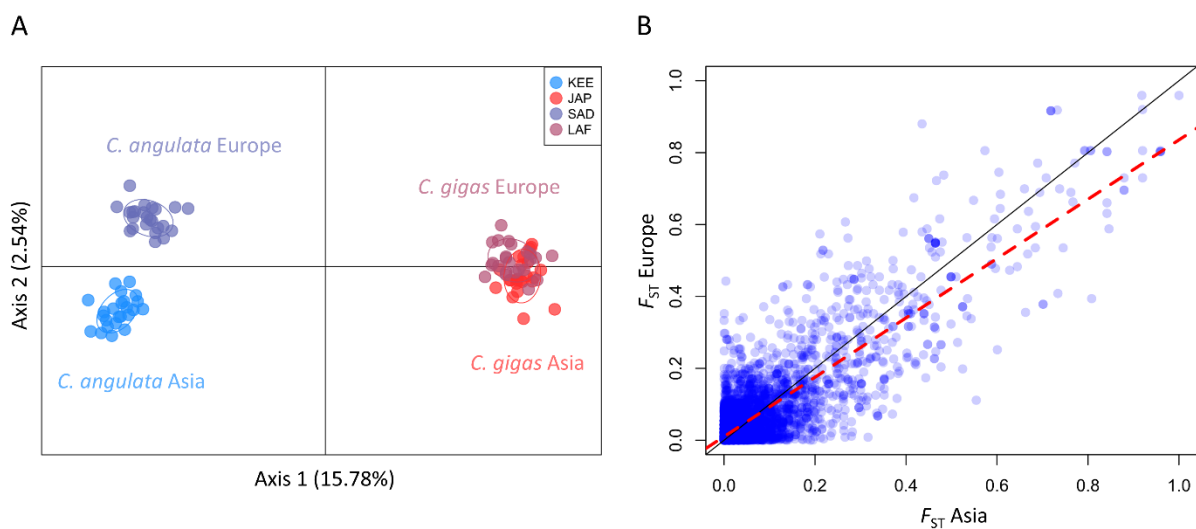

390

391

392



393 The between-population genetic structure revealed by the dAPC (Figure 3A) separated the two  
394 species along the first PC axis (explaining 15.78% of total variance) and the Asian and European  
395 populations of each species along the second axis (2.54% of total variance). The European populations  
396 of *C. angulata*, and to a lesser extent *C. gigas*, were slightly shifted toward the center of the first PC  
397 axis, indicating an increased genetic similarity of the two species in Europe.

398 Genetic differentiation between species was highly heterogeneous across the genome, with regions  
399 of elevated differentiation alternating with genetically undifferentiated regions (Figure 4). The  
400 maximum  $F_{ST}$  value between *C. gigas* and *C. angulata* was 1 in Asia and 0.96 in Europe. Between-  
401 species genetic differentiation at individual SNPs was highly positively correlated between Asia and  
402 Europe, although it was on average lower in Europe (Figure 3B).

403

404 **Fig. 4.** Genomic landscape of between-species genetic differentiation ( $F_{ST}$ ) measured at 10,144 SNPs  
405 (alternatively represented by black and grey points for odd and even chromosome numbers for  
406 convenience) along the ten Pacific oyster linkage groups. The red dotted line shows the genome-wide  
407 average  $F_{ST}$  and the grey line shows the local average  $F_{ST}$  calculated in 150 kb windows. Genetic  
408 differentiation between *C. angulata* and *C. gigas* is showed (A) in Asia and (B) in Europe.

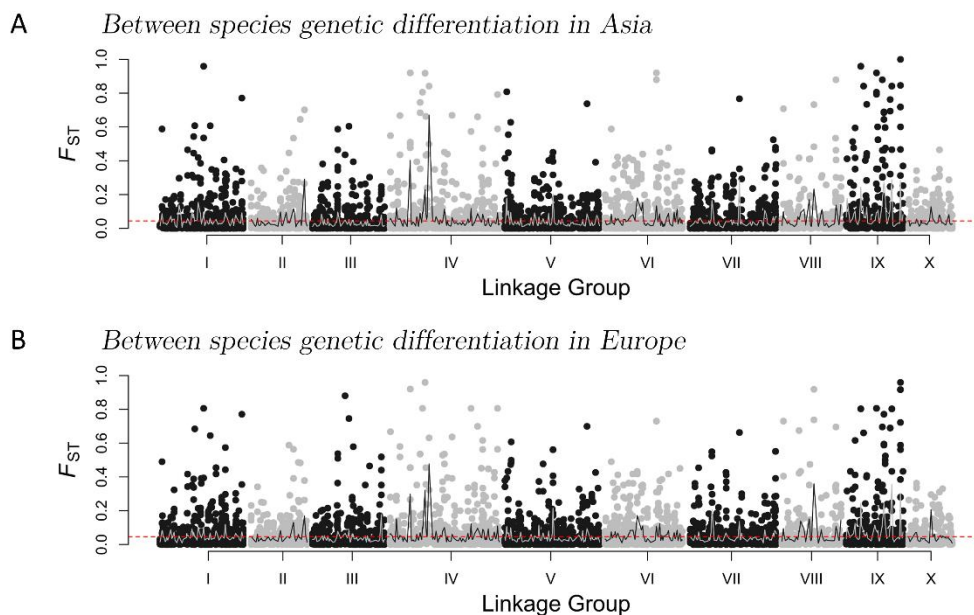

409

410

411 Chromosomal variation in average genetic differentiation between species was related to the local  
412 recombination rate. More precisely, we found a decreasing trend in the maximal amount of  
413 differentiation (measured by the 97.5<sup>th</sup> quantile of the distribution) with increasing local recombination  
414 rate (Figure 5). Moreover, within-species nucleotide diversity was significantly positively correlated  
415 with the local recombination rate (Supplementary Figure S5).

416

417 **Fig. 5.** Distribution of between-species genetic differentiation ( $F_{ST}$ ) as a function of the local  
418 recombination rate assessed with *MareyMap*. Each point represents an estimate of  $F_{ST}$  and  
419 recombination rate averaged in a 500 kb window. Outlier recombination rate values exceeding 9  
420 cM/Mb were excluded. The red dashed line represents the nonparametric 97.5<sup>th</sup> quantile regression fit  
421 of  $F_{ST}$  as a function of the local recombination rate.

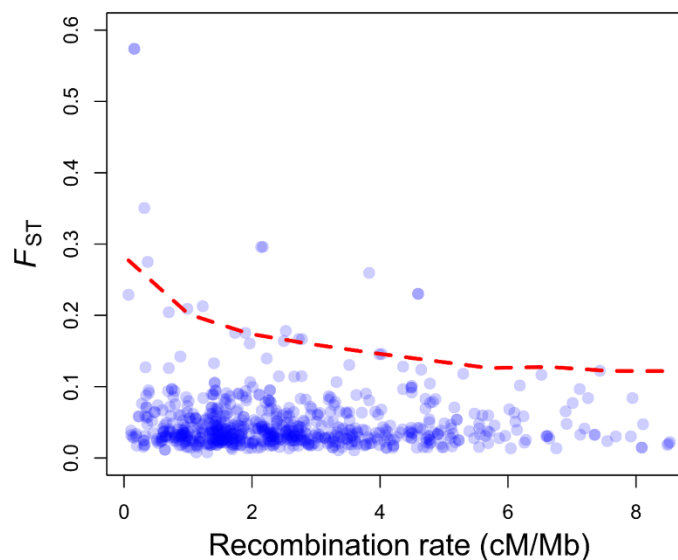

422

423

#### 424 ***Divergence history***

425 The demographic history of divergence between *C. angulata* and *C. gigas* inferred with *δaδi* showed  
426 evidence for a secondary contact in both Asia and Europe (Table 2). The JAFS presented in Figure 6  
427 show a high proportion of shared polymorphisms at high frequency (in the upper right and lower left  
428 corners) which is a characteristic footprint of secondary introgression that is not expected under a  
429 strict isolation model (Alcala et al., 2016, Roux et al., 2016) and explain the good support for the SC

430 model. Moreover, varying rates of introgression among loci (*i.e.* the SC2*m* model) was strongly  
 431 supported for both native and introduced species pairs. This model received a good statistical support  
 432 compared to the six other alternative models (Akaike weights > 0.95), and its goodness-of-fit showed  
 433 almost no trend in the distribution of residuals for both species pairs (Figure 6).

434

435 **Table 2.** Results of model fitting for seven alternative models of divergence between *C. angulata* and  
 436 *C. gigas* in Asia and Europe. In the order of appearance in the table: the model fitted, the maximum  
 437 likelihood estimate over 20 independent runs after 3 successive optimisation steps: simulated  
 438 annealing hot, cold and BFGS, the Akaike Information Criterion, the difference in AIC with the best  
 439 model (SC2*m*), Akaike weight, and *theta* parameter for the ancestral population before split.  
 440 Following are the inferred values for the model parameters (scaled by *theta*): the effective size of *C.*  
 441 *angulata* ( $N_1$ ) and *C. gigas* ( $N_2$ ) populations, the migration rates for the two categories of loci in the  
 442 genome (category 1:  $m_{12}$  and  $m_{21}$ , category 2:  $m'_{12}$  and  $m'_{21}$ ), the duration of the split ( $T_S$ ), of ancestral  
 443 migration ( $T_{AM}$ ) and secondary contact ( $T_{SC}$ ) episodes, and the proportion ( $P$ ) of the genome falling  
 444 within category 1 (experiencing migration rates  $m_{12}$  and  $m_{21}$ ).

| Species pair | Model            | anneal. hot      | anneal. cold     | BFGS            | AIC      | $\Delta_i$    | $w_i$          | $\theta$      | $N_1$         | $N_2$          | $m_{12}$       | $m_{21}$      | $m'_{12}$     | $m'_{21}$     | $T_S$  | $T_{AM}$ | $T_{SC}$      | $P$           |
|--------------|------------------|------------------|------------------|-----------------|----------|---------------|----------------|---------------|---------------|----------------|----------------|---------------|---------------|---------------|--------|----------|---------------|---------------|
| ASIA         | SI               | -247.3844        | -245.0567        | -244.2167       | 494.4335 | 61.3173       | 0.0000         | 94.0960       | 0.9363        | 19.8905        | -              | -             | -             | -             | 0.2422 | -        | -             | -             |
|              | IM               | -232.0492        | -231.6256        | -229.6122       | 469.2244 | 36.1082       | 0.0000         | 50.7159       | 1.1160        | 2.1658         | 1.4404         | 0.6423        | -             | -             | 1.7087 | -        | -             | -             |
|              | AM               | -246.4434        | -239.7242        | -229.6158       | 471.2316 | 38.1154       | 0.0000         | 53.1106       | 1.0452        | 2.1069         | 1.5443         | 0.6500        | -             | -             | 1.5652 | 0.0000   | -             | -             |
|              | SC               | -227.7188        | -227.7188        | -223.1180       | 458.2361 | 25.1198       | 0.0000         | 61.5886       | 1.2126        | 1.6412         | 2.1765         | 1.5932        | -             | -             | 0.8178 | -        | 0.1899        | -             |
|              | IM2 <i>m</i>     | -217.3343        | -217.3343        | -214.4709       | 444.9419 | 11.8257       | 0.0027         | 35.8268       | 2.2285        | 2.4318         | 3.7818         | 4.0944        | 0.2835        | 0.2487        | 3.0381 | -        | -             | 0.5496        |
|              | AM2 <i>m</i>     | -233.2967        | -219.8171        | -214.4997       | 446.9993 | 13.8831       | 0.0010         | 30.2063       | 2.7356        | 2.7870         | 2.4416         | 3.3503        | 0.2287        | 0.2133        | 3.8450 | 0.0001   | -             | 0.5603        |
| SC2 <i>m</i> | <b>-218.2059</b> | <b>-218.2059</b> | <b>-207.5581</b> | <b>433.1162</b> | <b>0</b> | <b>0.9963</b> | <b>56.5407</b> | <b>1.5600</b> | <b>1.5353</b> | <b>10.6952</b> | <b>11.2826</b> | <b>1.4966</b> | <b>1.5031</b> | <b>1.1291</b> | -      | -        | <b>0.0536</b> | <b>0.6336</b> |
| EUROPE       | SI               | -266.1601        | -266.1601        | -266.1370       | 538.2740 | 66.4534       | 0.0000         | 119.5436      | 0.7832        | 19.9447        | -              | -             | -             | -             | 0.2127 | -        | -             | -             |
|              | IM               | -251.9601        | -251.9601        | -250.9902       | 511.9804 | 40.1598       | 0.0000         | 78.0597       | 1.4969        | 1.0110         | 0.6372         | 1.8961        | -             | -             | 1.1803 | -        | -             | -             |
|              | AM               | -254.7446        | -254.3147        | -251.0059       | 514.0118 | 42.1913       | 0.0000         | 72.6025       | 1.6028        | 1.0537         | 0.5769         | 1.8227        | -             | -             | 1.4241 | 0.0000   | -             | -             |
|              | SC               | -258.8205        | -249.8626        | -245.4758       | 502.9515 | 31.1310       | 0.0000         | 87.7852       | 1.6884        | 0.8123         | 0.7821         | 3.8227        | -             | -             | 0.5498 | -        | 0.1525        | -             |
|              | IM2 <i>m</i>     | -239.2627        | -239.2627        | -231.3043       | 478.6086 | 6.7880        | 0.0321         | 61.9879       | 1.3816        | 1.8837         | 5.3928         | 3.1806        | 0.2426        | 0.4237        | 1.8432 | -        | -             | 0.6025        |
|              | AM2 <i>m</i>     | -244.92139       | -244.92139       | -231.3516       | 480.7032 | 8.8826        | 0.0113         | 65.9174       | 1.2964        | 1.7676         | 5.9929         | 3.3784        | 0.2603        | 0.4515        | 1.6631 | 0.0004   | -             | 0.6007        |
| SC2 <i>m</i> | <b>-233.321</b>  | <b>-233.321</b>  | <b>-226.910</b>  | <b>471.821</b>  | <b>0</b> | <b>0.9566</b> | <b>85.6599</b> | <b>1.1751</b> | <b>1.3148</b> | <b>10.3971</b> | <b>12.8181</b> | <b>0.9340</b> | <b>2.0132</b> | <b>0.6982</b> | -      | -        | <b>0.0644</b> | <b>0.5527</b> |

445

446

447 Therefore, the semi-permeable species-barrier model, in which introgression occurs at variable rates  
 448 across the genome since secondary contact, explains well the observed data. In the neutrally  
 449 introgressing fraction of the genome (*i.e.* 55 to 63% of the genome), gene flow was found to occur in  
 450 both directions at closely similar rates corresponding to 12 to 18 migrants per generation ( $N_e m$ , Table  
 451 2). By contrast, there was a 6 to 11-fold decrease in gene flow ( $m/m'$ , Table 2) in the remaining  
 452 fraction of the genome, due to reduced effective migration rates in both directions. Time parameters

453 indicated that the duration of isolation without gene flow was 11 to 21 longer than the duration of  
454 secondary gene flow ( $T_S/T_{SC}$ , Table 2). These results support that the allopatric divergence period was  
455 long enough to enable differentiation prior to secondary contact.

456

457 **Fig. 6.** Demographic divergence history of *C. angulata* and *C. gigas* in Asia (A) and Europe (B). The  
458 best selected model in both species pairs was the secondary contact model with two categories of loci  
459 experiencing different rates of introgression ( $SC2m$ ) and occurring in proportions  $P$  (for freely  
460 introgressing loci) and  $1-P$  (for loci with reduced effective migration rates) across the genome. Each  
461 plot shows the observed JAFS (upper left), the JAFS obtained under the maximum-likelihood  $SC2m$   
462 model (upper right), the spectrum of residuals with over (red) and under (blue) predicted SNPs (lower  
463 left), and the distribution of residuals (lower right).

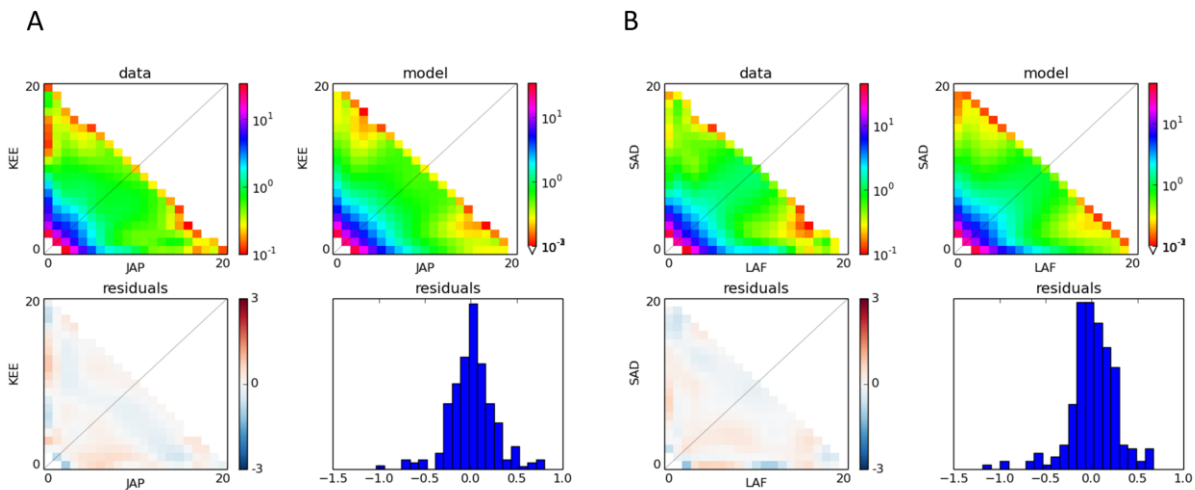

464

465

## 466 Discussion

### 467 *An improved scaffolding of the Pacific oyster genome*

468 Our new high-density linkage map in *C. gigas* adds to a series of first-generation linkage maps  
469 (Hubert & Hedgecock, 2004, Sauvage et al., 2010, Hubert et al., 2009, Plough & Hedgecock, 2011,  
470 Guo et al., 2012, Li & Guo, 2004, Zhong et al., 2014a) and more recent second-generation maps

471 (Hedgecock et al., 2015, Wang et al., 2016) that were produced in the Pacific oyster. Compared to the  
472 two most recent linkage maps, this map offers a slightly improved resolution, with an average marker-  
473 spacing of 0.64 cM compared to 1 cM in Hedgecock et al. (2015) and 0.8 cM in Wang et al. (2016).  
474 We paid attention to minimize the influence of the potentially widespread transmission ratio  
475 distortions observed across most of the 10 linkage groups (Plough, 2012, Plough & Hedgecock, 2011,  
476 Launey & Hedgecock, 2001, Hedgecock et al., 2015), by discarding distorted markers prior to map  
477 reconstruction. Our map, however, shows a good collinearity with the map produced by Hedgecock et  
478 al. (2015) that did not exclude distorted markers. This suggests that distortions of segregation ratios do  
479 not substantially affect the ordering of markers in *C. gigas* genetic maps, and further support that  
480 Hedgecock's consensus linkage map and ours provide a reasonable assessment of marker order and  
481 genetic distances across the Pacific oyster genome.

482 Consistent with what has been previously reported by Hedgecock et al. (2015), we found a high  
483 incidence of chimeric scaffolds (38.5% and 44.2%, respectively) in the oyster\_v9 assembly (Zhang et  
484 al., 2012; <http://www.oysterdb.com>). Splitting scaffolds to resolve mapping conflicts to different  
485 linkage groups decreased the scaffold N50 by 45.6% (401 to 218 kb), but the resc scaffolding step using  
486 BES increased the scaffold N50 again by 47% (320 kb). Due to the limited density of markers in our  
487 linkage map, this new assembly version (available at <ftp://ftp.ifremer.fr/ifremer/dataref/bioinfo/>) is not  
488 complete and tends to exclude especially the shortest scaffolds present in the oyster\_v9 assembly  
489 (Zhang et al., 2012). Therefore, only 50.1% (280.2 Mb) of the oyster\_v9 assembly could be anchored  
490 into 10 pseudo-chromosomes based on the information contained in our new linkage map. This  
491 underlines the need for an improved genome assembly in *C. gigas* using new information from higher  
492 density linkage maps and long read sequencing data. Such improvements are mandatory for all  
493 functional analyses relying on a complete genome description and a thorough annotation of gene  
494 sequences, such as genome-wide association studies (GWAS). However, for the purpose of this study,  
495 a partial chromosome-level assembly is sufficient to explore broad-scale genomic variation in genetic  
496 differentiation between the two studied sister taxa and its possible relationship with recombination rate  
497 variation.

498

499 ***Recombination rate variation across the genome***

500 The total length of our sex-averaged consensus map (965 cM) is intermediate to previous estimates  
501 that were reported from the two existing high-density linkage maps in the Pacific oyster (890-1084  
502 cM, Hedgecock et al., 2015, respectively, Wang et al., 2016). Considering the genome-size estimate of  
503 559 Mb (Zhang et al., 2012), this corresponds to an average recombination rate of 1.73 cM per Mb, a  
504 value within the range of average recombination rate values obtained across a wide diversity of animal  
505 species (Corbett-Detig et al., 2015, Stapley et al., 2017).

506 The chromosome-averaged recombination rate shows a 2.5 fold variation among linkage groups  
507 and is negatively correlated to chromosome length. Such a pattern has already been observed in  
508 several species including yeast (Kaback et al., 1992), human (Lander et al., 2001), stickleback (Roesti  
509 et al., 2013) and daphnia (Dukić et al., 2016), and has been commonly attributed to positive crossover  
510 interference. This phenomenon happens during meiosis, when the formation of an initial  
511 recombination event reduces the probability that an additional recombination event occurs nearby on  
512 the chromosome. If the mechanism of interference is still elusive, it is often assumed that a fixed  
513 number of crossovers happens per chromosome (between 1 and 2), making large chromosomes  
514 experiencing less recombination events per nucleotide position than smaller ones. Our results thus  
515 provide new empirical support for the existence of crossover interference in *C. gigas*.

516 We also revealed large-scale (i.e. megabase-scale) variation in local recombination rate within  
517 chromosomes. The general pattern we observed was a reduction of crossover rate in chromosome  
518 centers relative to peripheries. Similar patterns are widespread in animals, plants and fungi (reviewed  
519 in Berner & Roesti, 2017), and can be attributed to different but not mutually exclusive mechanisms.  
520 Firstly, a reduction in recombination near the centromere of metacentric chromosomes (Nachman,  
521 2002) can be hypothesized, possibly due to the presence of highly condensed heterochromatin.  
522 Secondly, crossover interference, which tends to produce evenly and widely spaced crossovers when  
523 multiple crossovers occur on the same chromosome, may increase the chance that multiple  
524 recombination events affect chromosomal extremities. Thirdly, heterochiasmy (i.e. different  
525 recombination rates and landscapes between sexes) could also explain these patterns (Stapley et al.,  
526 2017), especially if one sex tends to recombine preferentially in chromosomal extremities. In the

527 Pacific oyster, the comparison of male and female maps did not support the hypothesis of  
528 heterochiasmy (Hedgecock et al., 2015), so the observed recombination rate variation within  
529 chromosomes could be rather explained by centromere location and/or crossover interference.

530 The recombinational environment is known to affect the impact of natural selection on linked  
531 neutral diversity across a wide range of species, in which low-recombining regions generally display  
532 reduced levels of nucleotide diversity (Corbett-Detig et al., 2015). As expected under the joint effect  
533 of background selection (Charlesworth et al., 1993) and hitchhiking (Maynard Smith & Haigh, 1974)  
534 on linked neutral diversity, we found a positive relationship between the local recombination rate and  
535 nucleotide diversity across the Pacific oyster genome. However, the magnitude of this effect was  
536 rather small compared to what could be expected from comparative estimates in other invertebrate  
537 species supposed to have large population sizes. (Corbett-Detig et al., 2015) argued that the effect of  
538 natural selection on the reduction of linked neutral variation was stronger in species with large census  
539 sizes, but a reanalysis by (Coop, 2016) showed that this conclusion was not supported by the data. In  
540 addition, other invertebrate species studied so far tend to have smaller genomes than the oyster  
541 genome. Oysters are usually perceived as species with large effective population sizes and this is  
542 corroborated by a medium to high nucleotide diversity (Sauvage et al., 2007, Zhang et al., 2012).  
543 However, several empirical evidences from molecular evolution and population genetics studies have  
544 also shown that oysters have among the highest segregating loads of deleterious mutations observed in  
545 marine invertebrates (Sauvage et al., 2007, Plough, 2016). This may be due to a high variance in  
546 reproductive success (sweepstake effect) and population size fluctuations (Boudry, et al. 2002;  
547 Harrang, et al. 2013; Hedgecock 1994; Hedgecock and Pudovkin 2011; Plough 2016). We are lacking  
548 theoretical predictions on the effect of linked selection in a species with skewed offspring distribution,  
549 but the effect is likely more genome-wide during favorable sweepstake events than it is in the standard  
550 Wright-Fisher model.

551

### 552 ***Genome-wide diversity patterns within and between Pacific oyster species***

553 The core objectives of this study were to (i) determine the extent and variation in the level of  
554 differentiation within and between *C. angulata* and *C. gigas* across the genome, (ii) test the existence

555 of differences in the genomic landscape of differentiation between native and introduced species pairs,  
556 (iii) infer the history of gene flow during divergence, and finally (iv) relate interspecies divergence to  
557 underlying evolutionary processes including demography, selection and genomic constraints.

558 Our results reveal that the European introduction of *C. angulata* in the 16<sup>th</sup> century, and more  
559 recently of *C. gigas* in the 70's, did not lead to a reduction in genetic diversity for both species  
560 compared to source populations in their native range. This observation is rather common in the  
561 literature of marine invasions, and has been attributed to the combined effects of multiple  
562 introductions and high propagule pressure (Viard et al., 2016). Another possibility is that the initiation  
563 of the demographic wave of invasion can simply not occur without a sufficiently large number of  
564 individuals in species with a strong Allele effect like sessile broadcast spawners. In other words a  
565 successful marine introduction cannot happen without a high number of funders. We found a relatively  
566 low background level of differentiation between *C. gigas* and *C. angulata* (i.e. genome-wide averaged  
567  $F_{ST} = 0.045$ ), which is consistent with previous estimates based on microsatellite loci (Huvet et al.,  
568 2004, Huvet et al., 2000). However, differentiation was highly heterogeneous across the genome in  
569 both Asian and European populations, with peaks of elevated  $F_{ST}$  values being found in most  
570 chromosomes, sometimes even reaching differential allelic fixation in Asia. These 'genomic islands of  
571 differentiation' are commonly observed in genome scans for divergence between closely related  
572 species pairs (Wolf & Ellegren, 2017), and multiple mechanisms have been proposed to explain their  
573 formation (Cruickshank & Hahn, 2014, Burri et al., 2015, Ravinet et al., 2017, Yeaman et al., 2016).  
574 They broadly fall in two categories: (i) mechanisms of differential gene flow involving the existence  
575 of reproductive isolation and/or local adaptation loci acting as genetic barriers to interspecific gene  
576 flow (Barton & Bengtsson, 1986, Feder & Nosil, 2010), and (ii) heterogeneous divergence  
577 mechanisms due to variation in the rate of lineage sorting across the genome (Burri et al., 2015,  
578 Cruickshank & Hahn, 2014, Burri, 2017).

579 In order to test whether specific adaptations to different habitats participate to genetic barriers, we  
580 hypothesized that the different ecological conditions encountered by oysters in Europe would either  
581 result in relaxed divergent selection pressures on genes involved in local adaptation in Asia, or in new  
582 selective constraints targeting different subsets of genes. In both cases, we expect that the new



583 environmental conditions in Europe would promote a remodeling of the genomic landscape of species  
584 divergence and hence reduce the extent of parallelism in genetic differentiation between species-pairs  
585 from native and introduced populations. Contrary to that prediction, we found a remarkably high  
586 degree of divergence parallelism indicating that the genetic architecture of reproductive isolation  
587 between *C. angulata* and *C. gigas* has not been reinforced, nor significantly weakened following the  
588 co-introduction of the two species in Europe. Nevertheless, a slightly lower interspecific  
589 differentiation was found in Europe. This reduction was not driven by the most differentiated loci (Fig.  
590 3B), and therefore rather indicated increased gene flow across the whole genome than relaxed  
591 divergent selection on barrier loci in the novel habitat. Moreover, the result of the PCA suggests that  
592 more pronounced gene flow is ongoing from *C. gigas* to *C. angulata* than in the opposite direction in  
593 Europe, as revealed by the more pronounced shift of *C. angulata* samples from Portugal towards the  
594 central part of the first PCA axis compared to *C. gigas* samples from Brittany (Fig. 3A). This  
595 asymmetrical introgression pattern seems consistent with a demographic imbalance due to a higher  
596 abundance of *C. gigas* in European farms. Overall, these results suggest that the particular  
597 demographic conditions imposed by aquaculture in southern Europe have facilitated opportunities for  
598 genetic interactions between species, without modifying the nature of the species boundary.

599 The finding of unaltered genomic differentiation patterns in the introduced species-pair despite  
600 increased gene flow suggests either that the contact is too recent to observe significant effects, or that  
601 historical and architectural genomic features have played major role in shaping the genomic landscape  
602 of species divergence between Pacific cupped oysters. Moreover, heterogeneous genome divergence is  
603 predicted by the semipermeable species boundary model, in which neutral introgression is only  
604 permitted in genomic regions unlinked to reproductive isolation barriers (Harrison & Larson, 2014,  
605 Harrison & Larson, 2016). Under this model, elevated  $F_{ST}$  values above the background level indicate  
606 the location of genomic regions that are resistant to introgression due to the presence of reproductive  
607 isolation loci (i.e. speciation genes). The existence and the possible origin of a semi-permeable barrier  
608 to gene flow between *C. gigas* and *C. angulata* was addressed through the comparison of various  
609 theoretical models offering simplified representations of contrasted evolutionary scenarios. Our results  
610 indicated that contemporary differentiation patterns likely result from a long period of allopatric

611 divergence followed by a recent secondary contact with different rates of introgression among loci.  
612 This model consistently outperformed alternative scenarios in both native and introduced ranges,  
613 predicting observed differentiation patterns with very small residual errors (Figure 6). Inferred model  
614 parameters capturing semi-permeability indicated that the fraction of the genome experiencing  
615 reduced introgression rates amounts to 37-45 %, consistent with the view that the species barrier is  
616 still largely permeable to gene flow. Similar estimates have been obtained in other marine species-  
617 pairs analyzed with the same approach (Tine et al., 2014, Le Moan et al., 2016, Rougemont et al.,  
618 2017). In all these cases post-glacial secondary contacts between allopatrically diverged lineages have  
619 been inferred. The northwestern Pacific region is known to harbor multiple cases of marine species  
620 subdivided into divergent lineages that are supposed to have originated in separate glacial refugia,  
621 most likely corresponding to the current seas of Japan and China (reviewed in Ni et al., 2014). Our  
622 study provides the first genome-wide view of the evolutionary consequences of past sea-level  
623 regression in this region, and adds to previous studies suggesting their important role in initiating  
624 speciation in northwestern Pacific taxa (e.g. Shen et al., 2011).

625 In addition to providing evidence for partial reproductive isolation between *C. gigas* and *C.*  
626 *angulata*, our results also bring new empirical support for the role of recombination rate variation in  
627 shaping the genomic landscape of species divergence. A recent study in the European sea bass has  
628 shown that low-recombining regions experiencing accelerated rates of lineage sorting during allopatric  
629 phases are preferentially involved in the barrier to gene flow during secondary contact (Duranton et  
630 al., 2017). The negative relationship between differentiation and recombination in Pacific cupped  
631 oysters is consistent with the idea that foreign alleles are more efficiently removed by selection after  
632 introgression when recombination is locally reduced (Schumer, et al. 2017). This interpretation also  
633 suggests that the sites under selection are widespread across the genome, although not individually  
634 under strong selection (Aeschbacher et al., 2017). Evidence for this type of genetic architecture has  
635 recently been evidenced from hybridization studies in a number of animal and plant species (Simon et  
636 al., 2017).

637

638 **Conclusion**

639 Our results shed new light on the existence of reproductive isolation barriers between the two cupped  
640 oysters *C. angulata* and *C. gigas*. By providing empirical evidence for heterogeneous divergence  
641 patterns attributable to reduced introgression in low-recombining regions since secondary contact, we  
642 show that these semi-species are still evolving in the so-called “speciation grey zone” (Roux et al.,  
643 2016). Moreover, the finding of strong divergence parallelism between species-pairs from native and  
644 introduced areas suggests that the genomic architecture of reproductive isolation is not primarily  
645 determined by ecological divergence driven by local adaptations in the native range. Our study thus  
646 implies the existence of intrinsic genetic differences between the two species, which will be the focus  
647 of future investigations based on experimental crosses.

648

649 **Conflict of Interest**

650 All the authors declare no conflict of interest concerning the data presented here.

651

652 **Acknowledgements**

653 This work was supported by Interreg SUDOE “Aquagenet” (SOE2/P1/E287) and ANR  
654 “GAMETOGENES” (ANR-08-GENM041) projects, as well as from GIS-IBiSA and Ifremer. We  
655 would like to thank Brieg Pontreau for his help in microsatellite genotyping, the hatchery team of  
656 Ifremer La Tremblade for its help in the production of the biological material, and H el ene Holota from  
657 Inserm UMR 1090 TAGC for her kind assistance during the sonication of RAD libraries. We are also  
658 grateful to Patrick Gaffney for providing BAC clones and Pascal Favrel for managing BAC-end  
659 sequencing with the Genoscope. Golden Gate SNP genotyping was performed at the Genome  
660 Transcriptome Facility of Bordeaux (grants from Conseil R egional d’Aquitaine n 20030304002FA  
661 and 20040305003FA, from the European Union FEDER n 2003227 and from the Investissement  
662 d’Avenir ANR-10-EQPX-16-01). Sequencing was performed by the Genoscope, Integragen and the  
663 CNRS platform Maladies M etaboliques et Infectieuses.

664

665

## 666 References

- 667
- 668 Abbott, R., Albach, D., Ansell, S., Arntzen, J. W., Baird, S. J. E., Bierne, N., Boughman, J., Brelsford,  
669 A., Buerkle, C. A., Buggs, R., Butlin, R. K., Dieckmann, U., Eroukhmanoff, F., Grill, A.,  
670 Cahan, S. H., Hermansen, J. S., Hewitt, G., Hudson, A. G., Jiggins, C., Jones, J., Keller, B.,  
671 Marczewski, T., Mallet, J., Martinez-Rodriguez, P., Möst, M., Mullen, S., Nichols, R., Nolte,  
672 A. W., Parisod, C., Pfennig, K., Rice, A. M., Ritchie, M. G., Seifert, B., Smadja, C. M.,  
673 Stelkens, R., Szymura, J. M., Väinölä, R., Wolf, J. B. W. & Zinner, D. 2013. Hybridization  
674 and speciation. *Journal of Evolutionary Biology* 26: 229-246.
- 675 Aeschbacher, S., Selby, J. P., Willis, J. H. & Coop, G. 2017. Population-genomic inference of the  
676 strength and timing of selection against gene flow. *Proceedings of the National Academy of  
677 Sciences* 114: 7061-7066.
- 678 Alcalá, N., Jensen, J. D., Telenti, A. & Vuilleumier, S. 2016. The genomic signature of population  
679 reconnection following isolation: from theory to HIV. *G3: Genes, Genomes, Genetics* 6: 107-  
680 120.
- 681 Baird, N. A., Etter, P. D., Atwood, T. S., Currey, M. C., Shiver, A. L., Lewis, Z. A., Selker, E. U.,  
682 Cresko, W. A. & Johnson, E. A. 2008. Rapid SNP discovery and genetic mapping using  
683 sequenced RAD markers. *PLoS ONE* 3: e3376.
- 684 Barton, N. H. & Bengtsson, B. O. 1986. The barrier to genetic exchange between hybridising  
685 populations. *Heredity* 57: 357-376.
- 686 Batista F.M., Fonseca V.G., Ruano F., Boudry P. 2017. Asynchrony in settlement time between the  
687 closely related oysters *Crassostrea angulata* and *C. gigas* in Ria Formosa lagoon (Portugal).  
688 *Marine Biology* 164: 110.
- 689 Berner, D. & Roesti, M. 2017. Genomics of adaptive divergence with chromosome-scale  
690 heterogeneity in crossover rate. *Molecular Ecology* 26: 6351-6369.
- 691 Bierne, N., Welch, J., Loire, E., Bonhomme, F. & David, P. 2011. The coupling hypothesis: why  
692 genome scans may fail to map local adaptation genes. *Molecular Ecology* 20: 2044-2072.
- 693 Bierne, N., Gagnaire, P.-A. & David, P. 2013. The geography of introgression in a patchy environment  
694 and the thorn in the side of ecological speciation. *Current Zoology* 59: 72-86.
- 695 Boetzer, M., Henkel, C. V., Jansen, H. J., Butler, D. & Pirovano, W. 2011. Scaffolding pre-assembled  
696 contigs using SSPACE. *Bioinformatics* 27: 578-579.
- 697 Boudry, P., Heurtebise, S., Collet, B., Cornette, F. & Gérard, A. 1998. Differentiation between  
698 populations of the Portuguese oyster, *Crassostrea angulata* (Lamarck) and the Pacific oyster,  
699 *Crassostrea gigas* (Thunberg), revealed by mtDNA RFLP analysis. *Journal of experimental  
700 marine biology and ecology* 226: 279-291.
- 701 Boudry P., Collet B., Cornette F., Hervouet V., Bonhomme F. 2002. High variance in reproductive  
702 success of the Pacific oyster (*Crassostrea gigas*, Thunberg) revealed by microsatellite-based  
703 parentage analysis of multifactorial crosses. *Aquaculture* 204: 283-296.
- 704 Boudry P., Dégremont L., Haffray P. 2008. The genetic basis of summer mortality in Pacific oyster  
705 spat and potential for improving survival by selective breeding in France. Summer mortality  
706 of Pacific oyster-The Morest Project. Versailles, France: Quae Editions: 153-196.
- 707 Burri, R., Nater, A., Kawakami, T., Mugal, C. F., Olason, P. I., Smeds, L., Suh, A., Dutoit, L., Bureš,  
708 S. & Garamszegi, L. Z. 2015. Linked selection and recombination rate variation drive the  
709 evolution of the genomic landscape of differentiation across the speciation continuum of  
710 *Ficedula flycatchers*. *Genome research*: gr. 196485.115.
- 711 Burri, R. 2017. Interpreting differentiation landscapes in the light of long-term linked selection.  
712 *Evolution Letters* 1: 118-131.
- 713 Catchen, J. M., Amores, A., Hohenlohe, P., Cresko, W. & Postlethwait, J. H. 2011. Stacks: Building  
714 and genotyping loci de novo from short-read sequences. *G3: Genes, Genomes, Genetics* 1:  
715 171-182.
- 716 Catchen, J., Hohenlohe, P. A., Bassham, S., Amores, A. & Cresko, W. A. 2013. Stacks: an analysis  
717 tool set for population genomics. *Molecular ecology* 22: 3124-3140.
- 718 Charlesworth, B., Morgan, M. & Charlesworth, D. 1993. The effect of deleterious mutations on  
719 neutral molecular variation. *Genetics* 134: 1289-1303.

- 720 Coop, G. 2016. Does linked selection explain the narrow range of genetic diversity across species?  
721 bioRxiv: 042598.
- 722 Corbett-Detig, R. B., Hartl, D. L. & Sackton, T. B. 2015. Natural selection constrains neutral diversity  
723 across a wide range of species. *PLoS Biology* 13: e1002112.
- 724 Cruickshank, T. E. & Hahn, M. W. 2014. Reanalysis suggests that genomic islands of speciation are  
725 due to reduced diversity, not reduced gene flow. *Molecular Ecology* 23: 3133-3157.
- 726 Danecek, P., Auton, A., Abecasis, G., Albers, C. A., Banks, E., DePristo, M. A., Handsaker, R. E.,  
727 Lunter, G., Marth, G. T. & Sherry, S. T. 2011. The variant call format and VCFtools.  
728 *Bioinformatics* 27: 2156-2158.
- 729 Darling J.A., Bagley M.J., Roman J., Tepolt C.K., Geller J.B. 2008. Genetic patterns across multiple  
730 introductions of the globally invasive crab genus *Carcinus*. *Molecular Ecology* 17: 4992-5007.
- 731 Dégremont, L., Bédier, E. & Boudry, P. 2010. Summer mortality of hatchery-produced Pacific oyster  
732 spat (*Crassostrea gigas*). II. Response to selection for survival and its influence on growth and  
733 yield. *Aquaculture* 299: 21-29.
- 734 Dégremont L. 2011. Evidence of herpesvirus (OsHV-1) resistance in juvenile *Crassostrea gigas*  
735 selected for high resistance to the summer mortality phenomenon. *Aquaculture* 317: 94-98.
- 736 Dukić, M., Berner, D., Roesti, M., Haag, C. R. & Ebert, D. 2016. A high-density genetic map reveals  
737 variation in recombination rate across the genome of *Daphnia magna*. *BMC genetics* 17: 137.
- 738 Duranton, M., Allal, F., Fraïsse, C., Bierne, N., Bonhomme, F. & Gagnaire, P.-A. 2017. The origin  
739 and remolding of genomic islands of differentiation in the European sea bass. bioRxiv:  
740 223750.
- 741 Feder, J. L. & Nosil, P. 2010. The Efficacy of Divergence Hitchhiking in Generating Genomic Islands  
742 during Ecological Speciation. *Evolution* 64: 1729-1747.
- 743 Feder, J. L., Egan, S. P. & Nosil, P. 2012. The genomics of speciation-with-gene-flow. *Trends in*  
744 *Genetics* 28: 342-350.
- 745 Fraïsse, C., Belkhir, K., Welch, J. J. & Bierne, N. 2016. Local interspecies introgression is the main  
746 cause of extreme levels of intraspecific differentiation in mussels. *Molecular Ecology* 25: 269-  
747 286.
- 748 Gaffney P.M. Editor. *Journal of Shellfish Research*. 2008.
- 749 Gagnaire, P.-A., Broquet, T., Aurelle, D., Viard, F., Souissi, A., Bonhomme, F., Arnaud-Haond, S. &  
750 Bierne, N. 2015. Using neutral, selected, and hitchhiker loci to assess connectivity of marine  
751 populations in the genomic era. *Evolutionary Applications* 8: 769-786.
- 752 Grade, A., Chairi, H., Lallias, D., Power, D. M., Ruano, F., Leitão, A., Drago, T., King, J. W., Boudry,  
753 P. & Batista, F. M. 2016. New insights about the introduction of the Portuguese oyster,  
754 *Crassostrea angulata*, into the North East Atlantic from Asia based on a highly polymorphic  
755 mitochondrial region. *Aquatic Living Resources* 29: 404.
- 756 Grizel, H. & Héral, M. 1991. Introduction into France of the Japanese oyster (*Crassostrea gigas*). *ICES*  
757 *Journal of Marine Science* 47: 399-403.
- 758 Guo, X., Li, Q., Wang, Q. Z. & Kong, L. F. 2012. Genetic mapping and QTL analysis of growth-  
759 related traits in the Pacific oyster. *Marine Biotechnology* 14: 218-226.
- 760 Gutenkunst, R. N., Hernandez, R. D., Williamson, S. H. & Bustamante, C. D. 2009. Inferring the Joint  
761 Demographic History of Multiple Populations from Multidimensional SNP Frequency Data.  
762 *PLoS Genet* 5: e1000695.
- 763 Harrang, E., Lapègue, S., Morga, B. & Bierne, N. 2013. A high load of non-neutral amino-acid  
764 polymorphisms explains high protein diversity despite moderate effective population size in a  
765 marine bivalve with sweepstakes reproduction. *G3: Genes, Genomes, Genetics* 3: 333-341.
- 766 Harrison, R. G. & Larson, E. L. 2014. Hybridization, Introgression, and the Nature of Species  
767 Boundaries. *Journal of Heredity* 105: 795-809.
- 768 Harrison, R. G. & Larson, E. L. 2016. Heterogeneous genome divergence, differential introgression,  
769 and the origin and structure of hybrid zones. *Molecular ecology* 25: 2454–2466.
- 770 Hedgecock D. 1994. Does variance in reproductive success limit effective population sizes of marine  
771 organisms? In: Beaumont A, editor. *Genetics and evolution of aquatic organisms*. London,  
772 UK.: Chapman & Hall. p. 122–134.
- 773 Hedgecock, D. & Pudovkin, A. I. 2011. Sweepstakes reproductive success in highly fecund marine  
774 fish and shellfish: a review and commentary. *Bulletin of Marine Science* 87: 971-1002.

- 775 Hedgecock, D., Shin, G., Gracey, A. Y., Van Den Berg, D. & Samanta, M. P. 2015. Second-  
776 generation linkage maps for the pacific oyster *Crassostrea gigas* reveal errors in assembly of  
777 genome scaffolds. *G3: Genes, Genomes, Genetics* 5: 2007-2019.
- 778 Hellberg, M. E. 2009. Gene Flow and Isolation among Populations of Marine Animals. *Annual*  
779 *Review of Ecology, Evolution, and Systematics* 40: 291-310.
- 780 Hsiao, S.-T., Chuang, S.-C., Chen, K.-S., Ho, P.-H., Wu, C.-L. & Chen, C. A. 2016. DNA barcoding  
781 reveals that the common cupped oyster in Taiwan is the Portuguese oyster *Crassostrea*  
782 *angulata* (Ostreoida; Ostreidae), not *C. gigas*. *Scientific reports* 6: 34057.
- 783 Hubert, S. & Hedgecock, D. 2004. Linkage maps of microsatellite DNA markers for the Pacific oyster  
784 *Crassostrea gigas*. *Genetics* 168: 351-362.
- 785 Hubert, S., Cognard, E. & Hedgecock, D. 2009. Centromere mapping in triploid families of the Pacific  
786 oyster *Crassostrea gigas* (Thunberg). *Aquaculture* 288: 172-183.
- 787 Huvet, A., Lapegue, S., Magoulas, A. & Boudry, P. 2000. Mitochondrial and nuclear DNA  
788 phylogeography of *Crassostrea angulata*, the Portuguese oyster endangered in Europe.  
789 *Conservation Genetics* 1: 251-262.
- 790 Huvet, A., Balabaud, K., Bierre, N. & Boudry, P. 2001. Microsatellite analysis of 6-hour-old embryos  
791 reveals no preferential intraspecific fertilization between cupped oysters *Crassostrea gigas* and  
792 *Crassostrea angulata*. *Marine Biotechnology* 3: 448-453.
- 793 Huvet, A., Gérard, A., Ledu, C., Phélipot, P., Heurtebise, S. & Boudry, P. 2002. Is fertility of hybrids  
794 enough to conclude that the two oysters *Crassostrea gigas* and *Crassostrea angulata* are the  
795 same species? *Aquatic Living Resources* 15: 45-52.
- 796 Huvet, A., Fabioux, C., McCombie, H., Lapegue, S. & Boudry, P. 2004. Natural hybridization between  
797 genetically differentiated populations of *Crassostrea gigas* and *C. angulata* highlighted by  
798 sequence variation in flanking regions of a microsatellite locus. *Marine Ecology Progress*  
799 *Series* 272: 141-152.
- 800 Jeffery N., DiBacco C., Wringe B., Stanley R., Hamilton L., Ravindran P., Bradbury I. 2017. Genomic  
801 evidence of hybridization between two independent invasions of European green crab  
802 (*Carcinus maenas*) in the Northwest Atlantic. *Heredity* 119: 154.
- 803 Jeffery N.W., Bradbury I.R., Stanley R.R., Wringe B.F., Van Wyngaarden M., Lowen J.B., McKenzie  
804 C.H., Matheson K., Sargent P.S., DiBacco C. 2018. Genomewide evidence of environmentally  
805 mediated secondary contact of European green crab (*Carcinus maenas*) lineages in eastern  
806 North America. *Evolutionary Applications*.
- 807 Jombart, T. 2008. adegenet: a R package for the multivariate analysis of genetic markers.  
808 *Bioinformatics* 24: 1403-1405.
- 809 Kaback, D. B., Guacci, V., Barber, D. & Mahon, J. W. 1992. Chromosome size-dependent control of  
810 meiotic recombination. *Science* 256: 228-232.
- 811 Kelley, J. L., Brown, A. P., Therkildsen, N. O. & Foote, A. D. 2016. The life aquatic: advances in  
812 marine vertebrate genomics. *Nature Reviews Genetics* 17: 523.
- 813 Knowlton, N. 1993. Sibling species in the sea. *Annual review of ecology and systematics* 24: 189-216.
- 814 Lander, E. S., Linton, L. M., Birren, B., Nusbaum, C., Zody, M. C., Baldwin, J., Devon, K., Dewar,  
815 K., Doyle, M. & FitzHugh, W. 2001. Initial sequencing and analysis of the human genome.  
816 *Nature* 409: 860-921.
- 817 Langmead, B. & Salzberg, S. L. 2012. Fast gapped-read alignment with Bowtie 2. *Nature methods* 9:  
818 357-359.
- 819 Lapegue, S., Batista, F., Heurtebise, S., Yu, Z. & Boudry, P. 2004. Evidence for the presence of the  
820 Portuguese oyster, *Crassostrea angulata*, in northern China. *Journal of Shellfish Research* 23:  
821 759-763.
- 822 Lapegue, S., Harrang, E., Heurtebise, S., Flahauw, E., Donnadiou, C., Gayral, P., Ballenghien, M.,  
823 Genestout, L., Barbotte, L. & Mahla, R. 2014. Development of SNP-genotyping arrays in two  
824 shellfish species. *Molecular ecology resources* 14: 820-830.
- 825 Launey, S. & Hedgecock, D. 2001. High genetic load in the Pacific oyster *Crassostrea gigas*. *Genetics*  
826 159: 255-265.
- 827 Le Moan, A., Gagnaire, P. A. & Bonhomme, F. 2016. Parallel genetic divergence among coastal-  
828 marine ecotype pairs of European anchovy explained by differential introgression after  
829 secondary contact. *Molecular Ecology* 25: 3187-3202.

- 830 Li, G., Hubert, S., Bucklin, K., Ribes, V. & Hedgecock, D. 2003. Characterization of 79 microsatellite  
831 DNA markers in the Pacific oyster *Crassostrea gigas*. *Molecular Ecology Notes* 3: 228-232.
- 832 Li, L. & Guo, X. 2004. AFLP-based genetic linkage maps of the Pacific oyster *Crassostrea gigas*  
833 Thunberg. *Marine Biotechnology* 6: 26-36.
- 834 Li, R., Li, Q., Cornette, F., Dégremont, L. & Lapègue, S. 2010. Development of four EST-SSR  
835 multiplex PCRs in the Pacific oyster (*Crassostrea gigas*) and their validation in parentage  
836 assignment. *Aquaculture* 310: 234-239.
- 837 López-Flores, I., de la Herrán, R., Garrido-Ramos, M. A., Boudry, P., Ruiz-Rejón, C. & Ruiz-Rejón,  
838 M. 2004. The molecular phylogeny of oysters based on a satellite DNA related to transposons.  
839 *Gene* 339: 181-188.
- 840 Maynard Smith, J. & Haigh, J. 1974. The hitch-hiking effect of a favourable gene. *Genet Res* 23: 23-  
841 35.
- 842 Moretto, M., Cestaro, A., Troggio, M., Costa, F. & Velasco, R. (2010) Harry Plotter: A user friendly  
843 program to visualize genome and genetic map features. In: ECCB10, 9th. European  
844 Conference Computational Biology. pp., Ghent, Belgium.
- 845 Nachman, M. W. 2002. Variation in recombination rate across the genome: evidence and implications.  
846 *Current opinion in genetics & development* 12: 657-663.
- 847 Nachman, M. W. & Payseur, B. A. 2012. Recombination rate variation and speciation: theoretical  
848 predictions and empirical results from rabbits and mice. *Philosophical Transactions of the*  
849 *Royal Society B: Biological Sciences* 367: 409-421.
- 850 Ni, G., Li, Q. I., Kong, L. & Yu, H. 2014. Comparative phylogeography in marginal seas of the  
851 northwestern Pacific. *Molecular Ecology* 23: 534-548.
- 852 Noor, M. A. F. & Bennett, S. M. 2009. Islands of speciation or mirages in the desert? Examining the  
853 role of restricted recombination in maintaining species. *Heredity* 103: 439-444.
- 854 Palumbi, S. R. 1994. Genetic divergence, reproductive isolation, and marine speciation. *Annual*  
855 *Review of Ecology and Systematics*: 547-572.
- 856 Plough, L. V. & Hedgecock, D. 2011. Quantitative trait locus analysis of stage-specific inbreeding  
857 depression in the Pacific oyster *Crassostrea gigas*. *Genetics* 189: 1473-1486.
- 858 Plough, L. V. 2012. Environmental stress increases selection against and dominance of deleterious  
859 mutations in inbred families of the Pacific oyster *Crassostrea gigas*. *Molecular Ecology*:  
860 21:3974-3987.
- 861 Plough, L. V. 2016. Genetic load in marine animals: a review. *Current Zoology* 62: 567-579.
- 862 Ravinet, M., Faria, R., Butlin, R., Galindo, J., Bierne, N., Rafajlović, M., Noor, M., Mehlig, B. &  
863 Westram, A. 2017. Interpreting the genomic landscape of speciation: a road map for finding  
864 barriers to gene flow. *Journal of evolutionary biology* 30: 1450-1477.
- 865 Ravinet, M., Westram, A., Johannesson, K., Butlin, R., André, C. & Panova, M. 2015. Shared and  
866 nonshared genomic divergence in parallel ecotypes of *Littorina saxatilis* at a local scale.  
867 *Molecular ecology*. 27: 285-307.
- 868 Reece, K. S., Cordes, J. F., Stubbs, J. B., Hudson, K. L. & Francis, E. A. 2008. Molecular phylogenies  
869 help resolve taxonomic confusion with Asian *Crassostrea* oyster species. *Marine Biology* 153:  
870 709-721.
- 871 Ren, J., Liu, X., Jiang, F., Guo, X. & Liu, B. 2010. Unusual conservation of mitochondrial gene order  
872 in *Crassostrea* oysters: evidence for recent speciation in Asia. *BMC Evolutionary Biology* 10:  
873 394.
- 874 Rezvoy, C., Charif, D., Guéguen, L. & Marais, G. A. 2007. MareyMap: an R-based tool with graphical  
875 interface for estimating recombination rates. *Bioinformatics* 23: 2188-2189.
- 876 Roesti, M., Moser, D. & Berner, D. 2013. Recombination in the threespine stickleback genome—  
877 patterns and consequences. *Molecular ecology* 22: 3014-3027.
- 878 Rose, N. H., Bay, R. A., Morikawa, M. K. & Palumbi, S. R. 2018. Polygenic evolution drives species  
879 divergence and climate adaptation in corals. *Evolution* 72: 82-94.
- 880 Rougemont, Q., Gagnaire, P. A., Perrier, C., Genthon, C., Besnard, A. L., Launey, S. & Evanno, G.  
881 2017. Inferring the demographic history underlying parallel genomic divergence among pairs  
882 of parasitic and nonparasitic lamprey ecotypes. *Molecular ecology* 26: 142–162.

- 883 Roux, C., Fraisse, C., Romiguier, J., Anciaux, Y., Galtier, N. & Bierne, N. 2016. Shedding light on the  
884 grey zone of speciation along a continuum of genomic divergence. *PLoS biology* 14:  
885 e2000234.
- 886 Saarman N.P., Pogson G.H. 2015. Introgression between invasive and native blue mussels (genus  
887 *Mytilus*) in the central California hybrid zone. *Molecular Ecology* 24: 4723-4738.
- 888 Sauvage, C., Bierne, N., Lapegue, S. & Boudry, P. 2007. Single nucleotide polymorphisms and their  
889 relationship to codon usage bias in the Pacific oyster *Crassostrea gigas*. *Gene* 406: 13-22.
- 890 Sauvage, C., Boudry, P., De Koning, D. J., Haley, C. S., Heurtebise, S. & Lapègue, S. 2010. QTL for  
891 resistance to summer mortality and OsHV-1 load in the Pacific oyster (*Crassostrea gigas*).  
892 *Animal genetics* 41: 390-399.
- 893 Schumer M., Xu C., Powell D., Durvasula A., Skov L., Holland C., Sankararaman S., Andolfatto P.,  
894 Rosenthal G., Przeworski M. 2017. Natural selection interacts with the local recombination  
895 rate to shape the evolution of hybrid genomes. *bioRxiv*: 212407.
- 896 Sekino, M. & Yamashita, H. 2013. Mitochondrial DNA barcoding for Okinawan oysters: a cryptic  
897 population of the Portuguese oyster *Crassostrea angulata* in Japanese waters. *Fisheries science*  
898 79: 61-76.
- 899 Shen, K.-N., Jamandre, B. W., Hsu, C.-C., Tzeng, W.-N. & Durand, J.-D. 2011. Plio-Pleistocene sea  
900 level and temperature fluctuations in the northwestern Pacific promoted speciation in the  
901 globally-distributed flathead mullet *Mugil cephalus*. *BMC Evolutionary Biology* 11: 83.
- 902 Simon, A., Bierne, N. & Welch, J. J. 2017. Coadapted genomes and selection on hybrids: Fisher's  
903 geometric model explains a variety of empirical patterns. *bioRxiv*: 237925.
- 904 Stapley, J., Feulner, P. G., Johnston, S. E., Santure, A. W. & Smadja, C. M. 2017. Variation in  
905 recombination frequency and distribution across eukaryotes: patterns and processes. *Phil.*  
906 *Trans. R. Soc. B* 372: 20160455.
- 907 Takeo, I. & Sakai, S. 1961. Study of breeding of Japanese oyster, *Crassostrea gigas*. *Tohoku journal of*  
908 *agricultural research* 12: 125-171.
- 909 Taris, N., Baron, S., Sharbel, T., Sauvage, C. & Boudry, P. 2005. A combined microsatellite  
910 multiplexing and boiling DNA extraction method for high-throughput parentage analyses in  
911 the Pacific oyster (*Crassostrea gigas*). *Aquaculture Research* 36: 516-518.
- 912 Tine, M., Kuhl, H., Gagnaire, P.-A., Louro, B., Desmarais, E., Martins, R. S. T., Hecht, J., Knaust, F.,  
913 Belkhir, K., Klages, S., R., D., K., S., Piferrer, F., Guinand, B., Bierne, N., Volckaert, F. A.  
914 M., Bargelloni, L., Power, D. M., Bonhomme, F., Canario, A. V. M. & Reinhardt, R. 2014.  
915 The European sea bass genome and its variation provide insights into adaptation to  
916 euryhalinity and speciation. *Nature Communications* 5.
- 917 van Ooijen, J. W. (2006) JoinMap® 4, Software for the calculation of genetic linkage maps in  
918 experimental populations. pp., Kyazma B.V., Wageningen, Netherlands.
- 919 Viard, F., David, P. & Darling, J. A. 2016. Marine invasions enter the genomic era: three lessons from  
920 the past, and the way forward. *Current zoology* 62: 629-642.
- 921 Wang, H., Qian, L., Liu, X., Zhang, G. & Guo, X. 2010. Classification of a common cupped oyster  
922 from southern China. *Journal of Shellfish Research* 29: 857-866.
- 923 Wang, J., Li, L. & Zhang, G. 2016. A High-Density SNP Genetic Linkage Map and QTL Analysis of  
924 Growth-Related Traits in a Hybrid Family of Oysters (*Crassostrea gigas* × *Crassostrea*  
925 *angulata*) Using Genotyping-by-Sequencing. *G3: Genes|Genomes|Genetics* 6: 1417.
- 926 Wang, J., Xu, F., Li, L. & Zhang, G. 2014. A new identification method for five species of oysters in  
927 genus *Crassostrea* from China based on high-resolution melting analysis. *Chinese journal of*  
928 *oceanology and limnology* 32: 419-425.
- 929 Weir, B. S. & Cockerham, C. C. 1984. Estimating F-Statistics for the Analysis of Population  
930 Structure. *Evolution* 38: 1358-1370.
- 931 Westram, A., Galindo, J., Alm Rosenblad, M., Grahame, J., Panova, M. & Butlin, R. 2014. Do the  
932 same genes underlie parallel phenotypic divergence in different *Littorina saxatilis*  
933 populations? *Molecular ecology* 23: 4603-4616.
- 934 Wolf, J. B. & Ellegren, H. 2017. Making sense of genomic islands of differentiation in light of  
935 speciation. *Nature Reviews Genetics* 18: 87-100.
- 936 Yamtich, J., Voigt, M. L., Li, G. & Hedgecock, D. 2005. Eight microsatellite loci for the Pacific oyster  
937 *Crassostrea gigas*. *Animal genetics* 36: 524-526.



- 938 Yeaman, S., Aeschbacher, S. & Bürger, R. 2016. The evolution of genomic islands by increased  
939 establishment probability of linked alleles. *Molecular Ecology*. 25: 2542-2558.
- 940 Zhang, G., Fang, X., Guo, X., Li, L., Luo, R., Xu, F., Yang, P., Zhang, L., Wang, X., Qi, H., Xiong,  
941 Z., Que, H., Xie, Y., Holland, P. W. H., Paps, J., Zhu, Y., Wu, F., Chen, Y., Wang, J., Peng,  
942 C., Meng, J., Yang, L., Liu, J., Wen, B., Zhang, N., Huang, Z., Zhu, Q., Feng, Y., Mount, A.,  
943 Hedgecock, D., Xu, Z., Liu, Y., Domazet-Lošo, T., Du, Y., Sun, X., Zhang, S., Liu, B.,  
944 Cheng, P., Jiang, X., Li, J., Fan, D., Wang, W., Fu, W., Wang, T., Wang, B., Zhang, J., Peng,  
945 Z., Li, Y., Li, N., Wang, J., Chen, M., He, Y., Tan, F., Song, X., Zheng, Q., Huang, R., Yang,  
946 H., Du, X., Chen, L., Yang, M., Gaffney, P. M., Wang, S., Luo, L., She, Z., Ming, Y., Huang,  
947 W., Zhang, S., Huang, B., Zhang, Y., Qu, T., Ni, P., Miao, G., Wang, J., Wang, Q., Steinberg,  
948 C. E. W., Wang, H., Li, N., Qian, L., Zhang, G., Li, Y., Yang, H., Liu, X., Wang, J., Yin, Y. &  
949 Wang, J. 2012. The oyster genome reveals stress adaptation and complexity of shell  
950 formation. *Nature* 490: 49–54.
- 951 Zhong, X., Li, Q., Guo, X., Yu, H. & Kong, L. 2014a. QTL mapping for glycogen content and shell  
952 pigmentation in the Pacific oyster *Crassostrea gigas* using microsatellites and SNPs.  
953 *Aquaculture international* 22: 1877-1889.
- 954 Zhong, X., Li, Q., Yu, H. & Kong, L. 2014b. SNP mining in *Crassostrea gigas* EST data:  
955 transferability to four other *Crassostrea* species, phylogenetic inferences and outlier SNPs  
956 under selection. *PloS one* 9: e108256.
